# **Whole genome sequence analysis of *Salmonella* Typhi isolated in Thailand before and after the introduction of a national immunization program**

Zoe A. Dyson<sup>1,2\*</sup>, Duy Pham Thanh<sup>3</sup>, Ladaporn Bodhidatta<sup>4</sup>, Carl Jeffries Mason<sup>4</sup>, Apichai Srijan<sup>4</sup>, Maia A. Rabaa<sup>3,5</sup>, Phat Voong Vinh<sup>3</sup>, Tuyen Ha Thanh<sup>3</sup>, Guy E. Thwaites<sup>3,5</sup>, Stephen Baker<sup>3,5,6†</sup> and Kathryn E. Holt<sup>1,2†\*</sup>

<sup>1</sup> Centre for Systems Genomics, University of Melbourne, Parkville, Victoria 3052, Australia

<sup>2</sup> Department of Biochemistry and Molecular Biology, Bio21 Molecular Science and Biotechnology Institute, University of Melbourne, Parkville, Victoria 3010, Australia

<sup>3</sup> The Hospital for Tropical Diseases, Wellcome Trust Major Overseas Programme, Oxford University Clinical Research Unit, Ho Chi Minh City, Vietnam

<sup>4</sup> Department of Enteric Diseases, Armed Forces Research Institute of Medical Sciences, Bangkok, Thailand

<sup>5</sup> Centre for Tropical Medicine and Global Health, Oxford University, Oxford, United Kingdom

<sup>6</sup> The London School of Hygiene and Tropical Medicine, London, United Kingdom

\* Corresponding Author

† Joint senior authors

*S. Typhi* in Thailand before and after immunization

# 1 Abstract

2 Vaccines against *Salmonella* Typhi, the causative agent of typhoid fever, are commonly used  
3 by travellers, however, there are few examples of national immunization programs in endemic  
4 areas. There is therefore a paucity of data on the impact of typhoid immunization programs on  
5 localised populations of *S. Typhi*. Here we have used whole genome sequencing (WGS) to  
6 characterise 44 historical bacterial isolates collected before and after a national typhoid  
7 immunization program that was implemented in Thailand in 1977 in response to a large  
8 outbreak; the program was highly effective in reducing typhoid case numbers. Thai isolates  
9 were highly diverse, including 10 distinct phylogenetic lineages or genotypes. Novel  
10 prophage and plasmids were also detected, including examples that were previously only  
11 reported in *Shigella sonnei* and *Escherichia coli*. The majority of *S. Typhi* genotypes  
12 observed prior to the immunization program were not observed following it. Post-vaccine era  
13 isolates were more closely related to *S. Typhi* isolated from neighbouring countries than to  
14 earlier Thai isolates, providing no evidence for the local persistence of endemic *S. Typhi*  
15 following the national immunization program. Rather, later cases of typhoid appeared to be  
16 caused by the occasional importation of common genotypes from neighbouring Vietnam,  
17 Laos, and Cambodia. These data show the value of WGS in understanding the impacts of  
18 vaccination on pathogen populations and provide support for the proposal that large-scale  
19 typhoid immunization programs in endemic areas could result in lasting local disease  
20 elimination, although larger prospective studies are needed to test this directly.

21  
22  
23  
24  
25  
26  
27  
28

## 29 **Author Summary**

30 Typhoid fever is a systemic infection caused by the bacterium *Salmonella* Typhi. Typhoid  
 31 fever is associated with inadequate hygiene in low-income settings and a lack of sanitation  
 32 infrastructure. A sustained outbreak of typhoid fever occurred in Thailand in the 1970s, which  
 33 peaked in 1975-1976. In response to this typhoid fever outbreak the government of Thailand  
 34 initiated an immunization program, which resulted in a dramatic reduction in the number of  
 35 typhoid cases in Thailand. To better understand the population of *S. Typhi* circulating in  
 36 Thailand at this time, as well as the impact of the immunization program on the pathogen  
 37 population, we sequenced the genomes of 44 *S. Typhi* obtained from hospitals in Thailand  
 38 before and after the immunization program. The genome sequences showed that isolates of *S.*  
 39 *Typhi* bacteria isolated from post-immunization era typhoid cases were likely imported from  
 40 neighbouring countries, rather than strains that have persisted in Thailand throughout the  
 41 immunization period. Our work provides the first historical insights into *S. Typhi* in Thailand  
 42 during the 1970s, and provides a model for the impact of immunization on *S. Typhi*  
 43 populations.

44

45

46

47

48

49

50

51

52

53

54

55

56

## 57 **Introduction**

58 *Salmonella enterica* subspecies *enterica* serovar Typhi (*S. Typhi*) is a human restricted  
 59 bacterial pathogen and the etiological agent of typhoid fever. *S. Typhi* is transmitted faeco-  
 60 orally and can establish asymptomatic carriage in a small subset of an exposed population (1).  
 61 Recent estimates (2-4) place the global burden of typhoid fever at 25-30 million cases  
 62 annually, of which 200,000 are associated with deaths. Typhoid fever occurs most commonly  
 63 in industrialising countries, specifically in locations with limited sanitation and related  
 64 infrastructure (5); children and young adults are among the most vulnerable populations in  
 65 these settings (6-8). Antimicrobial therapy together with water sanitation and hygiene  
 66 (WASH) interventions are the major mechanisms by which typhoid fever is controlled (9,  
 67 10). However, none of these approaches are optimal and resistance against antimicrobials has  
 68 become increasingly common in *S. Typhi* since the 1970s (11-13). A number of typhoid  
 69 vaccines are licenced for use (14-18), however, they are not widely used as a public health  
 70 tools in endemic areas, with the exception of controlling severe outbreaks such as those  
 71 following natural disasters (19-22).

72  
 73 A sustained typhoid fever outbreak occurred in Thailand in the 1970s. A sharp increase in  
 74 cases was observed in 1973-1974, which finally peaked in 1975-1976. In response, the  
 75 government of Thailand established a national typhoid immunization program, which  
 76 represented the first programmatic use of a typhoid vaccine in the country (23). The  
 77 immunization program targeted over 5 million school aged children (7-12 years) each year in  
 78 Bangkok between 1977 and 1987 (80% of the eligible population). Thus, Thai school children  
 79 were eligible to receive a single locally produced heat/phenol-inactivated subcutaneous dose  
 80 of  $2.5 \times 10^8$  *S. Typhi* organisms annually (14, 23), before the program was halted in the early  
 81 1990s because of high rates of adverse reactions caused by the vaccine (22). To our  
 82 knowledge this is the only such programmatic use of a vaccine for controlling Typhoid fever  
 83 in children in Thailand. Data from four teaching hospitals in Bangkok showed a 93%  
 84 reduction in blood culture confirmed infections with *S. Typhi* between 1976 (n=2,000) and

185 1985 (n=132) (14, 23). Notably, no significant decline was observed in isolation rates of  
 186 *Salmonella* Paratyphi A (*S. Paratyphi* A), a *Salmonella* serovar distinct from *S. Typhi* that  
 187 causes a clinical syndrome indistinguishable from typhoid fever, but for which *S. Typhi*  
 188 vaccines provide little or no cross-protection (14). This observation suggests that the  
 189 reduction in *S. Typhi* infections was not attributable to improvements in infrastructure and  
 190 hygiene practices only (5, 14, 20, 23). While the inactivated *S. Typhi* vaccine was found to be  
 191 highly efficacious (22, 23), it is no longer used as a consequence of being overly reactogenic  
 192 (14, 16, 23, 24). A Vi capsular polysaccharide vaccine (15) and live-attenuated oral vaccine  
 193 of strain Ty21a (16) have since replaced this vaccine for travellers to endemic locations (5,  
 194 21, 24).

195  
 196 The typhoid immunization program in Thailand provided a unique opportunity to investigate  
 197 the impact of immunization on *S. Typhi* populations circulating within an endemic area. Here  
 198 we present an analysis of a historical collection of 44 *S. Typhi* isolates obtained from patients  
 199 in Thailand between 1973 and 1992 (before and during the immunization program). As *S.*  
 100 *Typhi* populations demonstrate little genetic diversity, we used whole genome sequencing  
 101 (WGS) to characterise these isolates, and core genome phylogenetic approaches to compare  
 102 the historic isolates from Thailand to a recently published global *S. Typhi* genomic  
 103 framework (4).

104

## 105 **Materials and methods**

### 106 ***Ethics statement***

107 This is a retrospective study of bacterial isolates unlinked to patient information and was not  
 108 subject to IRB approval.

109

### 110 ***Bacterial isolation and antimicrobial susceptibility testing***

111 Forty-four *S. Typhi* isolated from patients with suspected typhoid fever attending hospitals in  
 112 Bangkok, Nonthaburi, Loi, and Srakaew, in Thailand between 1973 and 1992 were available

for genome sequencing in this study (**Fig 1** and **Table S1**). At the time of original isolation, bacterial cultures were transferred on nutrient agar slants to the department of Enteric Diseases, Armed Forces Research Institute of Medical Sciences (AFRIMS), Bangkok, Thailand for identification and antimicrobial susceptibility testing. At AFRIMS, bacterial isolates were subcultured on Hektoen Enteric agar (HE) and identification was performed by biochemical testing on Kligler iron agar slants, tryptone broth for indole, lysine decarboxylase medium, ornithine decarboxylase medium, urease test, mannitol and motility media (Becker Dickenson, Thailand). Serological agglutination was performed using *Salmonella* O antisera and *Salmonella* Vi antiserum (Difco, USA). Bacterial strains were stored frozen at -70°C in 10% skimmed milk or lyophilised in 10% skimmed milk; lyophilized ampoules were stored at 2-8°C. Prior to DNA extraction for sequencing, lyophilized bacteria was rehydrated with trypticase soy broth, inoculated on McConkey agar and incubated at 37°C for 18-24 hours. If bacteria was stored frozen in skimmed milk, organisms were inoculated directly onto McConkey agar after thawing and then incubated at 37°C for 18-24 hours.

Antimicrobial susceptibility testing against ampicillin, chloramphenicol, cephalothin, gentamicin, kanamycin, neomycin, sulfisoxazole, trimethoprim/sulfamethoxazole, and tetracycline was performed by disk diffusion according to Clinical and Laboratory Standards Institute (CLSI) (25-28).

### ***Genome sequencing and SNP analysis***

Genomic DNA from the 44 *S. Typhi* from Thailand was extracted using the Wizard Genomic DNA Extraction Kit (Promega, Wisconsin, USA). Two µg of genomic DNA was subjected to indexed WGS on an Illumina Hiseq 2000 platform at the Wellcome Trust Sanger Institute, to generate 100 bp paired-end reads. For analysis of SNPs, paired end Illumina reads were mapped to the reference sequence of *S. Typhi* CT18 (accession no: AL513382) (29) using the RedDog (v1.4) mapping pipeline, available at <https://github.com/katholt/reddog>. RedDog uses Bowtie (v2.2.3) (30) to map reads to the reference sequence, then high quality SNPs

called with quality scores above 30 are extracted from the alignments using SAMtools (v0.1.19) (31). SNPs were filtered to exclude those with less than 5 reads mapped or with greater than 2.5 times the average read depth (representing putative repeated sequences), or with ambiguous base calls. For each SNP that passed these criteria in any one isolate, consensus base calls for the SNP locus were extracted from all genomes (ambiguous base calls and those with phred quality scores less than 20 were treated as unknowns and represented with a gap character). SNPs with confident homozygous allele calls (i.e. phred score >20) in >95% of the *S. Typhi* genomes (representing a 'soft' core genome of common *S. Typhi* sequences) were concatenated to produce an alignment of alleles at 45,893 variant sites. The resultant allele calls for 68 of these SNPs were used to assign isolates to previously defined lineages according to an extended *S. Typhi* genotyping framework (32) code available at <https://github.com/katholt/genotypphi>. SNPs called in phage regions, repetitive sequences (354 kb; ~7.4% of bases in the CT18 reference chromosome, as defined previously (33) or recombinant regions (~180kb; <4% of the CT18 reference chromosome, identified using Gubbins (v1.4.4) (34)) were excluded, resulting in a final set of 1,850 SNPs identified in an alignment length of 4,275,037 bp for the 44 isolates. SNP alleles from Paratyphi A strain 12601 (35) were also included as an outgroup to root the tree. For global context, raw read data (4) were also subjected to genotyping analysis and those isolates sharing the genotypes that were observed in the Thai collection (n=340; details in **Table S2**) were subjected to the same SNP analyses, resulting in a final set of 9,700 SNPs for a total of 386 isolates.

### ***Phylogenetic and SNP analysis***

Maximum likelihood (ML) phylogenetic trees (**Figs 1-2**) were constructed using the 1,850 and 9,700 bp SNP alignments, respectively, using RAxML (v 8.1.23) (36) with a generalized time-reversible model and a gamma distribution to model site specific recombination (GTR+ $\Gamma$  substitution model; GTRGAMMA in RAxML), with Felsenstein correction for ascertainment bias. Support for ML phylogenies was assessed via 100 bootstrap

169 pseudoanalyses of the alignments. For the larger tree containing global isolates, clades  
170 containing only isolates from only a single country were collapsed manually in R using the  
171 drop.tip() function in the *ape* package (37). Subtrees were extracted for each subclade, which  
172 are therefore each rooted by the other subclades. Pairwise SNP distances between isolates  
173 were calculated from the SNP alignments using the dist.gene() function in the *ape* package  
174 for R (37).

175

### 176 ***Accessory genome analysis***

177 Acquired antimicrobial resistance (AMR) genes were detected, and their precise alleles  
178 determined, by mapping to the ARG-Annot database (38) of known AMR genes using SRST2  
179 v0.1.5 (39). Plasmid replicon sequences were identified using SRST2 to screen reads for  
180 replicons in the PlasmidFinder database (40, 41). Raw read data was assembled *de novo* with  
181 SPAdes (v 3.5.0) (42) and circular contigs were identified visually and extracted using the  
182 assembly graph viewer Bandage (v0.7.0) (43). These putative plasmid sequences were  
183 annotated using Prokka (v1.10) (44) followed by manual curation. Where IncHI1 plasmid  
184 replicons were identified using SRST2, and their presence confirmed by visual inspection of  
185 the assembly graphs, IncHI1 plasmid MLST (pMLST) sequence types were determined using  
186 SRST2 (13, 45, 46). Where resistance genes were detected from short read data, Bandage was  
187 used to inspect their location in the corresponding *de novo* assembly graph in order to  
188 determine whether they were encoded in the bacterial chromosome or on a plasmid.  
189 Assembled contigs were concatenated and putative prophage genomes were identified with  
190 the PHAge Search Tool (PHAST) (47), and their novelty determined by BLASTN analysis  
191 against the GenBank database. Pairwise alignments between novel and known prophage  
192 sequences were visualised using the *genoPlotR* package for R (48).

193

### 194 **Nucleotide sequence and sequence read data accession numbers**

195 Raw sequence data have been submitted to the European Nucleotide Archive (ENA) under  
196 project PRJEB5281; individual sample accession numbers are listed in **Tables S1 and S2**.



197 Assembled phage and protein sequences were deposited in GenBank, accession numbers are  
198 listed in **Table 1**.

199

200

## 201 **Results**

### 202 *The population structure of S. Typhi in Thailand*

203 All 44 *S. Typhi* isolates collected between 1973 and 1992 were subjected to WGS and SNP  
204 analysis. Genome-wide SNPs were used to construct a ML phylogeny and isolates were  
205 assigned to previously defined genotypes (32) using a subset of SNPs (see **Methods**). These  
206 analyses subdivided the population into ten distinct genotypes, each corresponding to a  
207 specific lineage in the ML phylogeny (**Fig 1**). Genotype 3.2.1 (which includes the reference  
208 genome CT18, isolated from Vietnam in 1993 (29)) was the most common (n=14, 32%),  
209 followed by genotype 2.1.7 (n=10, 23%). Genotypes 2.0 (n=1, 2%) and 4.1 (n=3, 7%) were  
210 observed only in 1973 (pre-vaccine period). Genotypes 2.1.7 (n=10, 23%), 2.3.4 (n=1, 2%),  
211 3.4.0 (n=2, 5%), 3.0.0 (n=3, 7%), 3.1.2 (n=2, 5%), were observed only after 1981 (post-  
212 vaccine period). Each of these post-immunization genotypes was from a single location and  
213 time period (**Fig 1**), consistent with short-term localised transmission. The only exceptions  
214 were the two *S. Typhi* 3.1.2 isolates, that were from Srakaew in 1989 and Bangkok in 1992  
215 and separated by just 4 SNPs. Genotypes 3.2.1 and 2.4.0 were observed amongst both pre-  
216 and post-vaccine isolates.

217

### 218 *Thai S. Typhi in the context of a global genomic framework*

219 Based on the Thai *S. Typhi* genotyping results we hypothesised that the post-immunization  
220 typhoid infections in Thailand resulted from occasional re-introduction of *S. Typhi* from  
221 outside the country, as opposed to long-term persistence of *S. Typhi* lineages within Thailand.  
222 To explore this possibility, and to provide a global context for our analysis, we examined  
223 1,832 *S. Typhi* genomes from a recently published global collection that included isolates  
224 from 63 countries (4). Genome-wide SNP-based ML trees for each of these genotypes,

225 showing the relationships between Thai and global isolates, are shown in **Fig 2**. In general,  
 226 post-vaccine Thai isolates were closely related to recent isolates sourced from neighbouring  
 227 countries including Vietnam, Laos and Cambodia (**Fig 2**), consistent with regional endemic  
 228 circulation. In contrast, most pre-vaccine isolates had no close neighbours in the global  
 229 collection, particularly 2.0.0 strains (**Fig 2A**), suggesting they may have been Thailand-  
 230 specific lineages that have died out following the vaccine program. The *S. Typhi* genomes in  
 231 the global collection were mainly isolated 2-3 decades after the Thai isolates as we did not  
 232 have access to contemporaneous isolates from these countries that could identify specific  
 233 transfer events. However, all but three of the post-vaccine Thai isolates shared shorter SNP  
 234 distances with isolates from neighbouring countries than they did with pre-vaccination Thai  
 235 isolates (see **Fig 3**), consistent with these cases being caused by occasional re-introduction of  
 236 genotypes circulating in the region. Notably, Thai *S. Typhi* 3.2.1 that were isolated in 1986-7  
 237 clustered separately from the 1973 pre-vaccine isolates ( $\geq 60$  SNPs apart), but closely with  
 238 isolates from Vietnam and Cambodia (differing by as few as 7 SNPs; **Fig 2H**). Post-vaccine  
 239 Thai *S. Typhi* 2.4 formed two distinct groups that were not consistent with direct descentance  
 240 from earlier isolates (**Fig 2E**). These data are therefore consistent with transfer of *S. Typhi*  
 241 into Thailand from neighbouring countries during the post-immunization program era,  
 242 although the long-term circulation of ancestral populations in Thailand remains an unlikely  
 243 alternative explanation.

244

#### 245 ***Acquired antimicrobial resistance***

246 We identified acquired AMR genes in the genomes of four *S. Typhi* genotype 3.2.1 that were  
 247 isolated in Srakaew in 1986 (**Fig 1, Table 1**). These isolates shared the same four AMR  
 248 genes: *sulI* (sulphonamides), *catA1* (chloramphenicol), *tet(B)* (tetracyclines), and *aadA1*  
 249 (aminoglycosides) which were carried on near-identical plasmids of IncHI1 plasmid sequence  
 250 type 2 (PST2). Although the presence of insertion sequences (IS) in these plasmids prevented  
 251 the complete sequences from being assembled, the regions of these plasmids encoding the  
 252 AMR genes were identical in all assemblies. This commonality suggests they are a single

253 plasmid (referred to as pTy036\_01 in **Fig 1** and **Table 1**) that was likely acquired in a  
254 common ancestor of this clade. The chromosomal and IncHI1 plasmid sequences for these  
255 four isolates were very closely related to those of a 1993 Vietnamese isolate (Viety1-  
256 60\_1993) in the global *S. Typhi* collection (45), consistent with regional transfer.

257

# 258 ***Other plasmids and mobile genetic elements***

259 We identified three non-AMR related plasmids amongst the Thai isolates (**Fig 1, Table 1**).  
260 Ty004 (genotype 2.2) carried two novel plasmids that assembled into circular sequences,  
261 pTy004\_01 and pTy004\_02. The largest, pTy004\_01, was a novel variant of the cryptic  
262 plasmid pHCM2 (29, 49) (**Fig 4**). Ty004 was isolated in Bangkok in 1973, making  
263 pTy004\_01 the earliest example of a pHCM2-like plasmid reported to date. pTy004\_01 was  
264 distant from other pHCM2-like plasmids in the global *S. Typhi* genome collection, sharing  
265 92% coverage and 99% nucleotide identity with the reference sequence pHCM2 of *S. Typhi*  
266 CT18 (genotype 3.2.1) which was isolated approximately 20 years later in Vietnam (29). The  
267 pTy004\_01 sequence (**Fig 4**) appears to be ~2 kbp larger than pHCM2, and encodes an  
268 additional tRNA-Lys as well as an insertion of a hypothetical protein (*orf17*) into a putative  
269 DNA polymerase gene (HCM2.0015c in pHCM2, divided into *orf16* and *orf18* in  
270 pTy004\_01). Plasmid pTy004\_02 was ~38 kbp in size and similar to *E. coli* plasmid pEQ2  
271 (65% coverage, 98% nucleotide identity), encoding genes for conjugation, chromosomal  
272 partitioning, addiction systems and an abortive infection protein (*orf44*). Three isolates  
273 (Ty031, Ty042, and Ty049) all of genotype 3.0.0 and obtained from Srakaew in 1986, carried  
274 a ~40 kbp cryptic plasmid that we named pTy031\_01. This plasmid was similar to that carried  
275 by *Enterobacter hormaechei* strain CAV1176 (83% coverage, 96% identity) and encoded  
276 genes for chromosomal partitioning, addiction systems, and a putative restriction modification  
277 system (*orf33-orf34*).

278

279 PHAST analysis revealed the presence of novel intact prophages in three Thai *S. Typhi*  
280 isolates (**Fig 1, Table 1**). Two *S. Typhi* 3.1.2, isolated from Srakaew in 1989 and Bangkok in

1992, shared a novel phage STYP1 that was similar to fiAA91-ss infective for *Shigella sonnei* (Fig 5A). However, the *S. Typhi* phage lacked the cytolethal distending toxin *cdt* genes and the IS21 element found in phage fiAA91-ss (50). This prophage sequence had a mosaic architecture, incorporating a number of putative insertions of phage tail fiber genes that were not present in the fiAA91-ss reference genome (Fig 5A). Additionally, a single isolate of genotype 4.1 obtained from Bangkok in 1973 contained a novel SfIV-like phage, here named STYP2, that lacked the serotype conversion gene *Gtr* cluster and IS1 element of phage SfIV (51). Again, the novel Thai phage variant also encoded novel tail fiber genes not in the SfIV reference genome, as well as a Dam methylase gene (*orf37*) (Fig 5B).

## Discussion

These data provide a historical insight into the population structure of *S. Typhi* in Thailand in 1973 (pre-immunization program, n=11) and 1981-1992 (post-immunization program, n=33). It has been reported that the national *S. Typhi* immunization program in Thailand, which commenced in 1977, was highly effective in reducing the burden of typhoid fever (14). Our data are consistent with the hypothesis that the vaccine program successfully depleted the endemic *S. Typhi* population to the extent that most subsequent typhoid cases resulted from sporadic introduction of non-indigenous *S. Typhi*, rather than long-term persistence of the pre-vaccine era population. It is apparent that these introductions were sometimes accompanied by limited local transmissions, resulting in small, localized outbreaks, but we found no evidence to suggest that these result in the establishment of stable local source populations. Notably, the post-immunization *S. Typhi* isolates from Loi (in the north of Thailand near the border with Laos, from which it is separated by the Mekong river) were most closely related to Laos isolates, whilst those from the capital Bangkok and nearby Nonthaburi and Srakaew districts were closely related to other isolates from across Southeast Asia (Fig 2), suggesting there may have been multiple routes of import into Thailand.

308 Our study is limited by the sample of isolates available for analysis, which was small and  
 309 reflects opportunistic sampling of sporadic local cases in the four sites and historical storage.  
 310 A larger collection of historical isolates from Thailand and neighboring countries in the 1970s  
 311 and 1980s would help to further elucidate the epidemiological patterns of *S. Typhi* before and  
 312 after the vaccination program. However, from our data, it is notable that the Thai isolates  
 313 cluster according to site, consistent with limited local transmission rather than dissemination  
 314 of lineages between locations. The only exception to this was two genotype 3.1.2 isolates,  
 315 which were collected from Srakaew in 1989 and Bangkok in 1992 and differed by only 4  
 316 SNPs. This is consistent with either transfer between these cities in Thailand following an  
 317 initial introduction into the country, or two independent transfers into Thailand from a  
 318 common source. The phylogenetic structure is most suggestive of the latter, but denser  
 319 samples from Thailand and/or potential source populations would be required to resolve this  
 320 with confidence.

321  
 322 While our sample is small, this study is nevertheless the largest to date exploring genetic  
 323 diversity amongst *S. Typhi* from Thailand. An earlier global haplotyping study that included  
 324 seven Thai isolates (52) identified five distinct haplotypes in Thailand (H3, 1989; H42, 1990;  
 325 H50, 2002; Vi- H52, 1990; H79, 2002), three of which are related to genotypes that we  
 326 identified amongst Thai strains in this study (H79, 2.3.4; H52, 3.4; H42, 3.1.2) (32).  
 327 Genotype 4.3.1 (H58) was not found amongst our historical Thai isolates. This is consistent  
 328 with previously published spatiotemporal analyses of the global isolate collection, which  
 329 showed this rapidly expanding clone only began spreading throughout Asia after 1990 (4). To  
 330 our knowledge the only evidence to date of the presence of 4.3.1 (H58) in Thailand comes  
 331 from the global study (4), in which three isolates were identified from 2010-2011, most likely  
 332 introduced from India. Therefore, our genomic snapshot of the Thai *S. Typhi* population is  
 333 consistent with previous insights and is likely reasonably representative for the study period.  
 334 In the years following the vaccination program the prevalence of Typhoid fever in Thailand  
 335 has continued to decline (53, 54). The vaccination program has been credited with reducing

disease incidence in Thailand and was followed by increased economic development in the region as well as improvements to both water and sanitation systems that have likely improved the control of such outbreaks (53, 54). Consequently, Typhoid fever is longer considered a serious public health threat in Thailand (53).

The presence of novel plasmids and prophages in the Thai isolates is also noteworthy. While small plasmids of unknown function have been observed in *S. Typhi* previously (55), they are infrequent compared to the IncHI1 MDR plasmid and the cryptic plasmid pHCM2 (33). Presumably, such plasmids are ephemeral; possibly because their maintenance imposes a fitness burden on the host cells so a strong selective advantage is required for retention (56, 57). It is also possible that the lack of previous reports regarding the diversity of small plasmids in *S. Typhi* reflects a technological complexity, however, this is bypassed with high-throughput WGS and we detected negligible small plasmid content in the global collection of 1,832 genomes using the same screening approach (58). Notably, few of the Thai plasmids share nucleotide sequence homology with those previously described in *S. Typhi*, but were closely related to those found in other *Enterobacteriaceae*. The novel pHCM2-like plasmid (pTy004\_01) and two additional plasmids (pTy004\_02 and pTy031\_01) harbored genes associated with phage resistance, which could provide protection against phage predation (59-62). We also observed two novel prophages integrated into Thai genomes, which both showed variation in their phage tail structural regions compared to close neighbors found in *Shigella/E. coli*. These regions are typically responsible for binding of phage to host receptors (63-65), thus the variation in these regions may be associated with recent adaptations to the *S. Typhi* host. While genomic data from more recent *S. Typhi* collections shows limited evidence for genetic exchange with other organisms (4), the detection amongst older Thai isolates of both phage and plasmids that have been previously associated with *E. coli/Shigella* suggests that genetic exchange may have been more common in the past or in certain localized populations.

364 Overall, these data provide valuable historical insights into the *S. Typhi* populations  
 365 circulating in Thailand during the 1970s and 1980s, and early examples of the two most  
 366 common *S. Typhi* plasmids, as well as other mobile elements identified within the *S. Typhi*  
 367 population. Importantly, while genomic epidemiology has been applied to study typhoid  
 368 transmission, antimicrobial resistance evolution and antibiotic treatment failure in various  
 369 settings (66-68), this study provides an important proof-of-principle demonstration that this  
 370 approach can also provide useful insights into the impact of typhoid vaccines on circulating  
 371 bacterial populations. This should motivate the adoption of WGS methods to monitor *S.*  
 372 *Typhi* populations during future immunization programs and other large-scale interventions,  
 373 which could potentially identify differential impacts on distinct genotypes.

## 374     **References**

- 375        1. Parry CM, Hien TT, Dougan G, White NJ, Farrar JJ. Typhoid fever. *N Engl J*  
376        *Med.* 2002;347(22):1770-82.
  
- 377        2. Mogasale V, Maskery B, Ochiai RL, Lee JS, Mogasale VV, Ramani E, et al.  
378        Burden of typhoid fever in low-income and middle-income countries: a  
379        systematic, literature-based update with risk-factor adjustment. *Lancet Glob*  
380        *Health.* 2014;2(10):e570-e80.
  
- 381        3. Crump JA, Mintz ED. Global trends in typhoid and paratyphoid Fever. *Clin*  
382        *Infect Dis.* 2010;50(2):241-6.
  
- 383        4. Wong VK, Baker S, Pickard DJ, Parkhill J, Page AJ, Feasey NA, et al.  
384        Phylogeographical analysis of the dominant multidrug-resistant H58 clade of  
385        *Salmonella Typhi* identifies inter- and intracontinental transmission events.  
386        *Nat Genet.* 2015;47(6):632-9.
  
- 387        5. Connor BA, Schwartz E. Typhoid and paratyphoid fever in travellers.  
388        *Lancet Infect Dis.* 2005;5(10):623-8.
  
- 389        6. Crump JA, Luby SP, Mintz ED. The global burden of typhoid fever. *Bull*  
390        *World Health Organ.* 2004;82(5):346-53.
  
- 391        7. Sur D, von Seidlein L, Manna B, Dutta S, Deb AK, Sarkar BL, et al. The  
392        malaria and typhoid fever burden in the slums of Kolkata, India: data from a  
393        prospective community-based study. *Trans R Soc Trop Med Hyg.*  
394        2006;100(8):725-33.
  
- 395        8. Karkey A, Arjyal A, Anders KL, Boni MF, Dongol S, Koirala S, et al. The  
396        Burden and Characteristics of Enteric Fever at a Healthcare Facility in a  
397        Densely Populated Area of Kathmandu. *PLoS ONE.* 2010;5(11):e13988.
  
- 398        9. Cairncross S, Cumming O, Jeandron A, Rheingans R, Ensink J, Brown J.  
399        Water, Sanitation and Hygiene Evidence Paper. London: Department for  
400        International Development. 2013.



- 401 10. Bhutta ZA. Current concepts in the diagnosis and treatment of typhoid  
402 fever. *BMJ*. 2006;333(7558):78-82.
- 403 11. Chau TT, Campbell JI, Galindo CM, Van Minh Hoang N, Diep TS, Nga TTT,  
404 et al. Antimicrobial Drug Resistance of *Salmonella enterica* Seroovar Typhi in  
405 Asia and Molecular Mechanism of Reduced Susceptibility to the  
406 Fluoroquinolones. *Antimicrob Agents Chemother*. 2007;51(12):4315-23.
- 407 12. Kariuki S, Revathi G, Muyodi J, Mwituria J, Munyalo A, Mirza S, et al.  
408 Characterization of Multidrug-Resistant Typhoid Outbreaks in Kenya. *J Clin*  
409 *Microbiol*. 2004;42(4):1477-82.
- 410 13. Holt KE, Phan MD, Baker S, Duy PT, Nga TVT, Nair S, et al. Emergence of a  
411 Globally Dominant IncHI1 Plasmid Type Associated with Multiple Drug  
412 Resistant Typhoid. *PLoS Negl Trop Dis*. 2011;5(7):e1245.
- 413 14. Bodhidatta L, Taylor DN, Thisyakom U, Echeverria P. Control of Typhoid  
414 Fever in Bangkok, Thailand, by Annual Immunization of Schoolchildren with  
415 Parenteral Typhoid Vaccine. *Rev Infect Dis*. 1987;9(4):841-5.
- 416 15. Klugman K, Koornhof H, Schneerson R, Cadoz M, Gilbertson I, Robbins J, et  
417 al. Protective activity of Vi capsular polysaccharide vaccine against typhoid  
418 fever. *Lancet*. 1987;330(8569):1165-9.
- 419 16. Levine M, Black R, Ferreccio C, Germanier R. Large-scale field trial of  
420 Ty21A live oral typhoid vaccine in enteric-coated capsule form. *Lancet*.  
421 1987;329(8541):1049-52.
- 422 17. Ashcroft MT, Singh B, Nicholson CC, Ritchie JM, Sobryan E, Williams F. A  
423 seven-year field trial of two typhoid vaccines in Guyana. *Lancet*.  
424 1967;290(7525):1056-9.
- 425 18. Waddington CS, Darton TC, Jones C, Haworth K, Peters A, John T, et al. An  
426 Outpatient, Ambulant-Design, Controlled Human Infection Model Using  
427 Escalating Doses of *Salmonella* Typhi Challenge Delivered in Sodium  
428 Bicarbonate Solution. *Clin Infect Dis*. 2014;58(9):1230-40.

- 429 19. Scobie HM, Nilles E, Kama M, Kool JL, Mintz E, Wannemuehler KA, et al.  
430 Impact of a targeted typhoid vaccination campaign following cyclone Tomas,  
431 Republic of Fiji, 2010. *Am J Trop Med Hyg.* 2014;90(6):1031-8.
- 432 20. Thompson CN, Kama M, Acharya S, Bera U, Clemens J, Crump JA, et al.  
433 Typhoid fever in Fiji: a reversible plague? *Trop Med Int Health.*  
434 2014;19(10):1284-92.
- 435 21. Whitaker JA, Franco-Paredes C, del Rio C, Edupuganti S. Rethinking  
436 typhoid fever vaccines: implications for travelers and people living in highly  
437 endemic areas. *J Travel Med.* 2009;16(1):46-52.
- 438 22. DeRoeck D, Ochiai RL, Yang J, Anh DD, Alag V, Clemens JD. Typhoid  
439 vaccination: the Asian experience. *Expert Rev Vaccines.* 2008;7(5):547-60.
- 440 23. Guzman CA, Borsutzky S, Griot-Wenk M, Metcalfe IC, Pearman J, Collioud  
441 A, et al. Vaccines against typhoid fever. *Vaccine.* 2006;24(18):3804-11.
- 442 24. Ochiai RL, Acosta CJ, Agtini M, Bhattacharya SK, Bhutta ZA, Do CG, et al.  
443 The Use of Typhoid Vaccines in Asia: The DOMI Experience. *Clin Infect Dis.*  
444 2007;45(Supplement 1):S34-S8.
- 445 25. CLSI. Performance standards for antimicrobial disk susceptibility tests.  
446 Approved standard. CLSI document M02. Wayne, Pa: CLSI; 1984.
- 447 26. CLSI. Performance standards for antimicrobial disk susceptibility tests.  
448 Tentative standard. CLSI document M02. Wayne, Pa: CLSI; 1979.
- 449 27. CLSI. Performance standards of antimicrobial disk susceptibility tests.  
450 Tentative standard. = CLSI document M02-A4. Wayne, Pa: CLSI; 1988.
- 451 28. CLSI. Performance standards for antimicrobial disk susceptibility tests.  
452 Approved Standard. CLSI document. = M02-A4. Wayne, Pa: CLSI; 1990.
- 453 29. Parkhill J, Dougan G, James KD, Thomson NR, Pickard D, Wain J, et al.  
454 Complete genome sequence of a multiple drug resistant *Salmonella enterica*  
455 serovar Typhi CT18. *Nature.* 2001;413(6858):848-52.

- 456 30. Langmead B, Salzberg SL. Fast gapped-read alignment with Bowtie 2. Nat  
457 Meth. 2012;9(4):357-9.
- 458 31. Li H, Handsaker B, Wysoker A, Fennell T, Ruan J, Homer N. The sequence  
459 alignment/Map format and SAMtools. Bioinformatics. 2009;25.
- 460 32. Wong VK, Baker S, Connor TR, Pickard D, Page AJ, Dave J, et al. An  
461 extended genotyping framework for Salmonella enterica serovar Typhi, the  
462 cause of human typhoid. Nat Commun. 2016;7:12827.
- 463 33. Holt KE, Parkhill J, Mazzoni CJ, Roumagnac P, Weill F-X, Goodhead I. High-  
464 throughput sequencing provides insights into genome variation and  
465 evolution in Salmonella Typhi. Nat Genet. 2008;40.
- 466 34. Croucher NJ, Page AJ, Connor TR, Delaney AJ, Keane JA, Bentley SD, et al.  
467 Rapid phylogenetic analysis of large samples of recombinant bacterial whole  
468 genome sequences using Gubbins. Nucleic Acids Res. 2014.
- 469 35. Holt KE, Thomson NR, Wain J, Langridge GC, Hasan R, Bhutta ZA, et al.  
470 Pseudogene accumulation in the evolutionary histories of Salmonella  
471 enterica serovars Paratyphi A and Typhi. BMC genomics. 2009;10:36.
- 472 36. Stamatakis A. RAxML-VI-HPC: maximum likelihood-based phylogenetic  
473 analyses with thousands of taxa and mixed models. Bioinformatics.  
474 2006;22(21):2688-90.
- 475 37. Paradis E, Claude J, Strimmer K. APE: Analyses of Phylogenetics and  
476 Evolution in R language. Bioinformatics. 2004;20(2):289-90.
- 477 38. Gupta SK, Padmanabhan BR, Diene SM, Lopez-Rojas R, Kempf M,  
478 Landraud L, et al. ARG-ANNOT, a New Bioinformatic Tool To Discover  
479 Antibiotic Resistance Genes in Bacterial Genomes. Antimicrob Agents and  
480 Chemother. 2014;58(1):212-20.
- 481 39. Inouye M, Dashnow H, Raven L-A, Schultz MB, Pope BJ, Tomita T. SRST2:  
482 rapid genomic surveillance for public health and hospital microbiology labs.  
483 Genome Med. 2014;6.

484 40. Carattoli A, Bertini A, Villa L, Falbo V, Hopkins KL, Threlfall EJ.  
485 Identification of plasmids by PCR-based replicon typing. J Microbiol Meth.  
486 2005;63(3):219-28.

487 41. Carattoli A, Zankari E, García-Fernández A, Voldby Larsen M, Lund O, Villa  
488 L, et al. In Silico Detection and Typing of Plasmids using PlasmidFinder and  
489 Plasmid Multilocus Sequence Typing. Antimicrob Agents Chemother.  
490 2014;58(7):3895-903.

491 42. Bankevich A, Nurk S, Antipov D, Gurevich AA, Dvorkin M, Kulikov AS, et al.  
492 SPAdes: A New Genome Assembly Algorithm and Its Applications to Single-  
493 Cell Sequencing. J Comp Biol. 2012;19(5):455-77.

494 43. Wick RR, Schultz MB, Zobel J, Holt KE. Bandage: interactive visualisation  
495 of de novo genome assemblies. Bioinformatics. 2015.

496 44. Seemann T. Prokka: rapid prokaryotic genome annotation.  
497 Bioinformatics. 2014.

498 45. Phan M-D, Kidgell C, Nair S, Holt KE, Turner AK, Hinds J, et al. Variation in  
499 Salmonella enterica Serovar Typhi IncHI1 Plasmids during the Global Spread  
500 of Resistant Typhoid Fever. Antimicrob Agents Chemother. 2009;53(2):716-  
501 27.

502 46. Jolley K, Maiden M. BIGSdb: Scalable analysis of bacterial genome  
503 variation at the population level. BMC Bioinformatics. 2010;11(1):595.

504 47. Zhou Y, Liang Y, Lynch KH, Dennis JJ, Wishart DS. PHAST: a fast phage  
505 search tool. Nucleic Acids Res. 2011;39(Web Server issue):W347-52.

506 48. Guy L, Roat Kultima J, Andersson SGE. genoPlotR: comparative gene and  
507 genome visualization in R. Bioinformatics. 2010;26(18):2334-5.

508 49. Kidgell C, Pickard D, Wain J, James K, Diem Nga LT, Diep TS, et al.  
509 Characterisation and distribution of a cryptic Salmonella typhi plasmid  
510 pHCM2. Plasmid. 2002;47(3):159-71.

511 50. Allue-Guardia A, Imamovic L, Muniesa M. Evolution of a self-inducible  
512 cytolethal distending toxin type V-encoding bacteriophage from *Escherichia*  
513 *coli* O157:H7 to *Shigella sonnei*. *J Virol*. 2013;87(24):13665-75.

514 51. Jakheta R, Talukder K, Verma N. Isolation, characterization and  
515 comparative genomics of bacteriophage SfIV: a novel serotype converting  
516 phage from *Shigella flexneri*. *BMC genomics*. 2013;14(1):677.

517 52. Roumagnac P, Weill FX, Dolecek C, Baker S, Brisse S, Chinh NT, et al.  
518 Evolutionary history of *Salmonella typhi*. *Science*. 2006;314.

519 53. DeRoeck D, Clemens JD, Nyamete A, Mahoney RT. Policymakers' views  
520 regarding the introduction of new-generation vaccines against typhoid fever,  
521 shigellosis and cholera in Asia. *Vaccine*. 2005;23(21):2762-74.

522 54. IHME. Global Burden of Disease Study 2015 Seattle, USA: Institute for  
523 Health Metrics and Evaluation; 2015 [cited 2016 08/12/2016]. Available  
524 from: <http://ghdx.healthdata.org/gbd-results-tool>.

525 55. Holt KE, Perkins TT, Dougan G, Kingsley RA. Genomics and pathogenesis  
526 of *Salmonella enterica* serovars Typhi and Paratyphi A. *Salmonella: From*  
527 *genome to function*. 2011:107-21.

528 56. Rychlik I, Gregorova D, Hradecka H. Distribution and function of plasmids  
529 in *Salmonella enterica*. *Vet Microbiol*. 2006;112(1):1-10.

530 57. Murray BE, Levine MM, Cordano AM, D'Ottone K, Jayanetra P, Kopecko D,  
531 et al. Survey of plasmids in *Salmonella typhi* from Chile and Thailand. *J Infect*  
532 *Dis*. 1985;151(3):551-5.

533 58. Jørgensen TS, Xu Z, Hansen MA, Sørensen SJ, Hansen LH. Hundreds of  
534 Circular Novel Plasmids and DNA Elements Identified in a Rat Cecum  
535 Metamobilome. *PLoS ONE*. 2014;9(2):e87924.

536 59. Buckling A, Rainey PB. Antagonistic coevolution between a bacterium and  
537 a bacteriophage. *P Roy Soc B-Biol Sci*. 2002;269(1494):931-6.

538 60. Koskella B, Brockhurst MA. Bacteria-phage coevolution as a driver of  
539 ecological and evolutionary processes in microbial communities. FEMS  
540 microbiology reviews. 2014;38(5):916-31.

541 61. Lenski R. Coevolution of Bacteria and Phage: Are There Endless Cycles of  
542 Bacterial Defenses and Phage Counterdefenses? J Theor Biol. 1984;108:319-  
543 25.

544 62. Schrag SJ, Mittler JE. Host-parasite coexistence: The role of spatial refuges  
545 in stabilizing bacteria-phage interactions. Am Nat. 1996;148(2):348-77.

546 63. Kutter E, Raya R, Carlson K. Molecular mechanisms of phage infection. In:  
547 Kutter E, Sulakvelidze A, editors. Bacteriophages Biology and Applications.  
548 Florida: CRC Press; 2005.

549 64. Guttman B, Raya R, Kutter E. Chapter 3 - Basic Phage Biology. In: Kutter E,  
550 Sulakvelidze A, editors. Bacteriophages - Biology and Applications. New York:  
551 CRC Press; 2005. p. 29-66.

552 65. Thomson N, Baker S, Pickard D, Fookes M, Anjum M, Hamlin N, et al. The  
553 role of prophage-like elements in the diversity of Salmonella enterica  
554 serovars. J Mol Biol. 2004;339(2):279-300.

555 66. International Typhoid C, Wong VK, Holt KE, Okoro C, Baker S, Pickard DJ,  
556 et al. Molecular Surveillance Identifies Multiple Transmissions of Typhoid in  
557 West Africa. PLOS Negl Trop Dis. 2016;10(9):e0004781.

558 67. Pham Thanh D, Thompson CN, Rabaa MA, Sona S, Sopheary S, Kumar V, et  
559 al. The Molecular and Spatial Epidemiology of Typhoid Fever in Rural  
560 Cambodia. PLoS Negl Trop Dis. 2016;10(6):e0004785.

561 68. Pham Thanh D, Karkey A, Dongol S, Ho Thi N, Thompson CN, Rabaa MA, et  
562 al. A novel ciprofloxacin-resistant subclade of H58 Salmonella Typhi is  
563 associated with fluoroquinolone treatment failure. eLife. 2016;5:e14003.

564 **Table 1. Summary of mobile genetic elements observed in *S. Typhi* isolates from Thailand**

| Isolate | Genotype | Name           | Replicons detected and/or attachment sites | Size (no. putative genes) | Accession number | Function                                                          |
|---------|----------|----------------|--------------------------------------------|---------------------------|------------------|-------------------------------------------------------------------|
| 004     | 2.0.0    | pTy004_01      | FIB (pHCM2)                                | 108, 998 bp (133)         | KX833209         | Cryptic, Phage defence (Rha protein)                              |
|         |          | pTy004_02      | X1                                         | 38, 266 bp (49)           | KX833212         | Phage defence (Abortive Infection)                                |
| 031     | 3.0.0    | pTy031_01      | N/A                                        | 40, 835 bp (53)           | KX833210         | Phage defence (Restriction                                        |
| 042     |          |                |                                            |                           |                  | Modification)                                                     |
| 049     |          |                |                                            |                           |                  |                                                                   |
| 036     | 3.2.1    | pTy036_01      | HI1                                        | ~215 kbp                  | N/A.             | AMR ( <i>sulI</i> , <i>catA1</i> , <i>tet(B)</i> , <i>aadA1</i> ) |
| 046     |          |                |                                            |                           |                  |                                                                   |
| 051     |          |                |                                            |                           |                  |                                                                   |
| 052     |          |                |                                            |                           |                  |                                                                   |
| 054     | 3.1.2    | Prophage STYP1 | <i>attL</i> CAAGCTGGTCAG                   | 28,946 bp (39)            | KX833211         | Cryptic                                                           |
| 055     |          |                | <i>attR</i> CAAGCTGGTCAG                   |                           |                  |                                                                   |

| Isolate | Genotype | Name           | Replicons detected and/or attachment sites                                                                                                              | Size (no. putative genes) | Accession number | Function |
|---------|----------|----------------|---------------------------------------------------------------------------------------------------------------------------------------------------------|---------------------------|------------------|----------|
| 013     | 4.1.0    | Prophage STYP2 | <i>attL</i><br><br>ATTCGTAATGCGAAGG<br>TCGTAGGTTCGACTCCT<br>ATTATCGGCACCAT<br><i>attR</i><br><br>ATTCGTAATGCGAAGG<br>TCGTAGGTTCGACTCCT<br>ATTATCGGCACCA | 34, 780 bp (50)           | KX833213         | Cryptic  |

565



566 **Figure 1. Genomic analysis of Thai S. Typhi.**

567 (A) Maximum likelihood phylogenetic tree (outgroup rooted). Strains are labelled with their  
568 three digit name code, year of isolation (pink shading indicates post-vaccine isolates); source  
569 location (shaded by city, as indicated in panel B); and plasmid content (any antibiotic  
570 resistance genes are indicated in italics). Branch lengths are indicative of the number of SNPs.  
571 (B) Locations from which S. Typhi were isolated in Thailand. (C) Total number of positive  
572 blood cultures of S. Typhi (black) and Paratyphi A (grey) between 1970 and 1985;  
573 immunization period is indicated in pink; reproduced using data from reference (14).

575 **Figure 2. Zoomed in phylogenies showing relationships of Thai S. Typhi to global**

576 **isolates.** Maximum likelihood trees including S. Typhi isolates from the Thai and global  
577 collections are shown, for each genotype that was observed amongst the Thai isolates.  
578 Colored branches and nodes indicate country of origin, according to the inset legend. Year of  
579 isolation is shown to the left; pink and red, Thai isolates obtained before and after the  
580 introduction of the immunization program; grey and black, non-Thai isolates obtained before  
581 and after the introduction of the immunization program. Thai isolates are also labelled to  
582 indicate their city of origin: L, Loi; B, Bangkok; S, Srakaew; N, Nonthaburi. SNP distances  
583 between isolates as well as AMR plasmids are labelled, with any resistance genes indicated in  
584 italics. Branch lengths are indicative of the number of SNPs.

586 **Figure 3. SNP distances for Thai and global collection isolates.**

587 SNP distance between post-vaccine Thai isolates and their closest pre-vaccine Thai and post-  
588 vaccine global collection relatives, colored points indicate country of origin.

590 **Figure 4. Blast comparison of novel plasmid pTy004\_01 with pHCM2 (AL513383).**

591 Shaded regions indicate areas of sequence homology, intensity of shading indicates relative  
592 nucleotide similarity. Arrows represent protein coding genes, direction indicates coding  
593 strand.

594 **Figure 5. Blast comparison of novel phages observed in Thai S. Typhi isolates to nearest**  
 595 **known phage sequences.**

596 (A) Novel phage STYP1 compared to Shigella sonnei phage fiAA91-ss (NC\_022750). (B)  
 597 Novel phage STYP2 compared to Shigella flexneri phage SfIV (NC\_022749). Shaded regions  
 598 indicate areas of sequence homology, intensity of shading indicates relative nucleotide  
 599 similarity. Arrows represent protein coding genes (direction indicates coding strand), colored  
 600 by encoded protein functions: red, DNA packaging module; orange, virion morphogenesis  
 601 module; yellow, cargo genes; blue, DNA replication and lysogenic cycle maintenance; green,  
 602 lysis module.

603

604

**A**

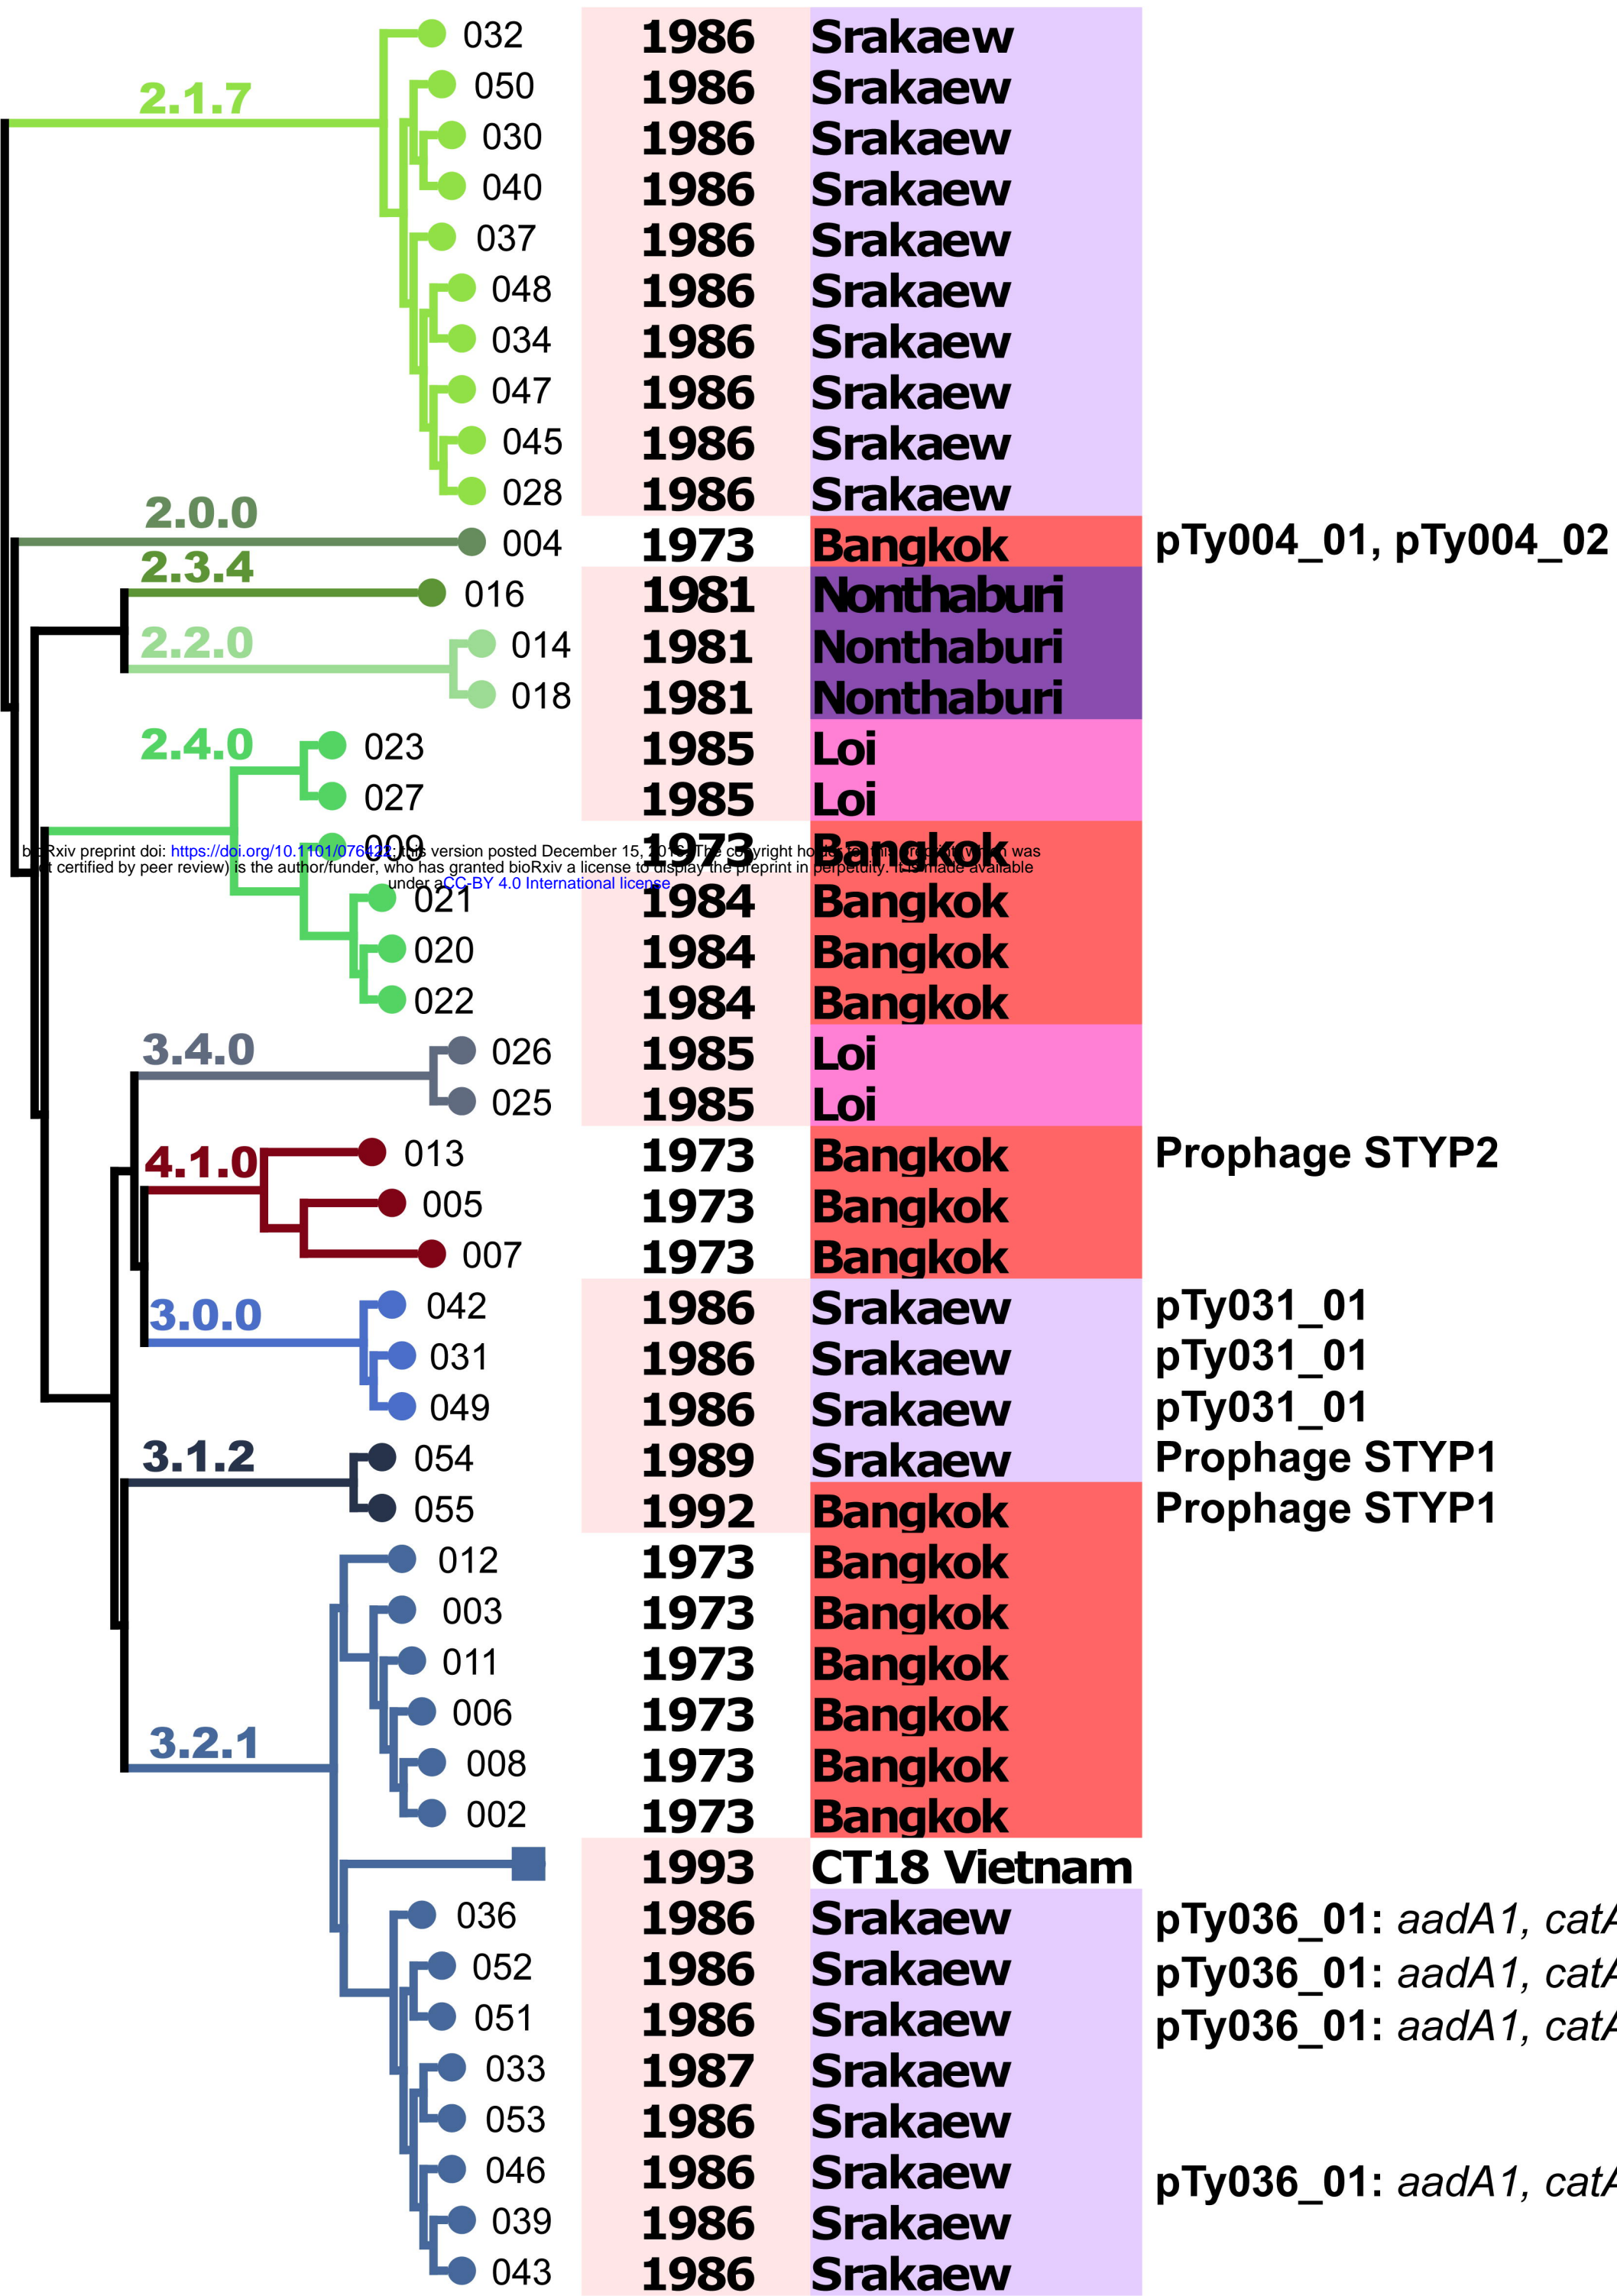

**B**

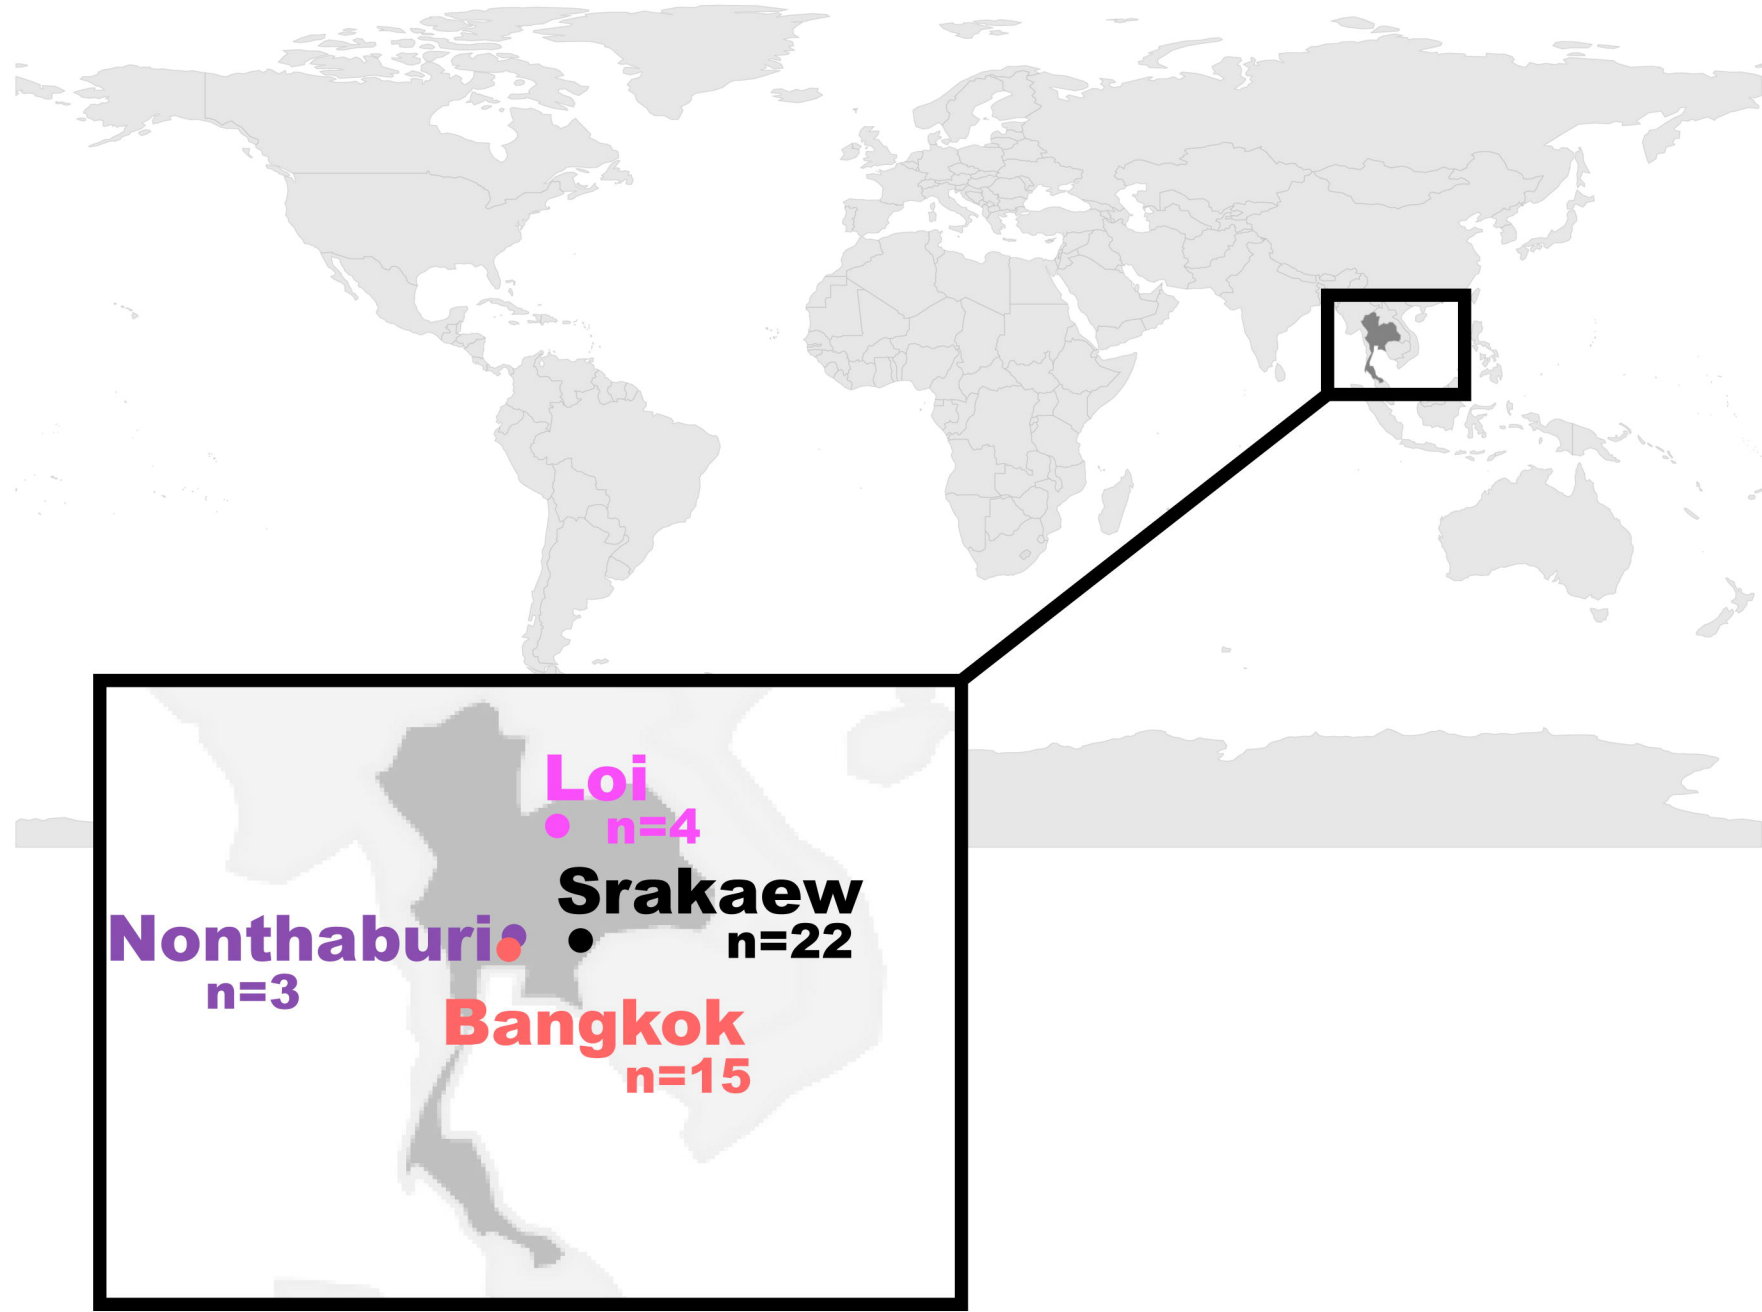

**C**

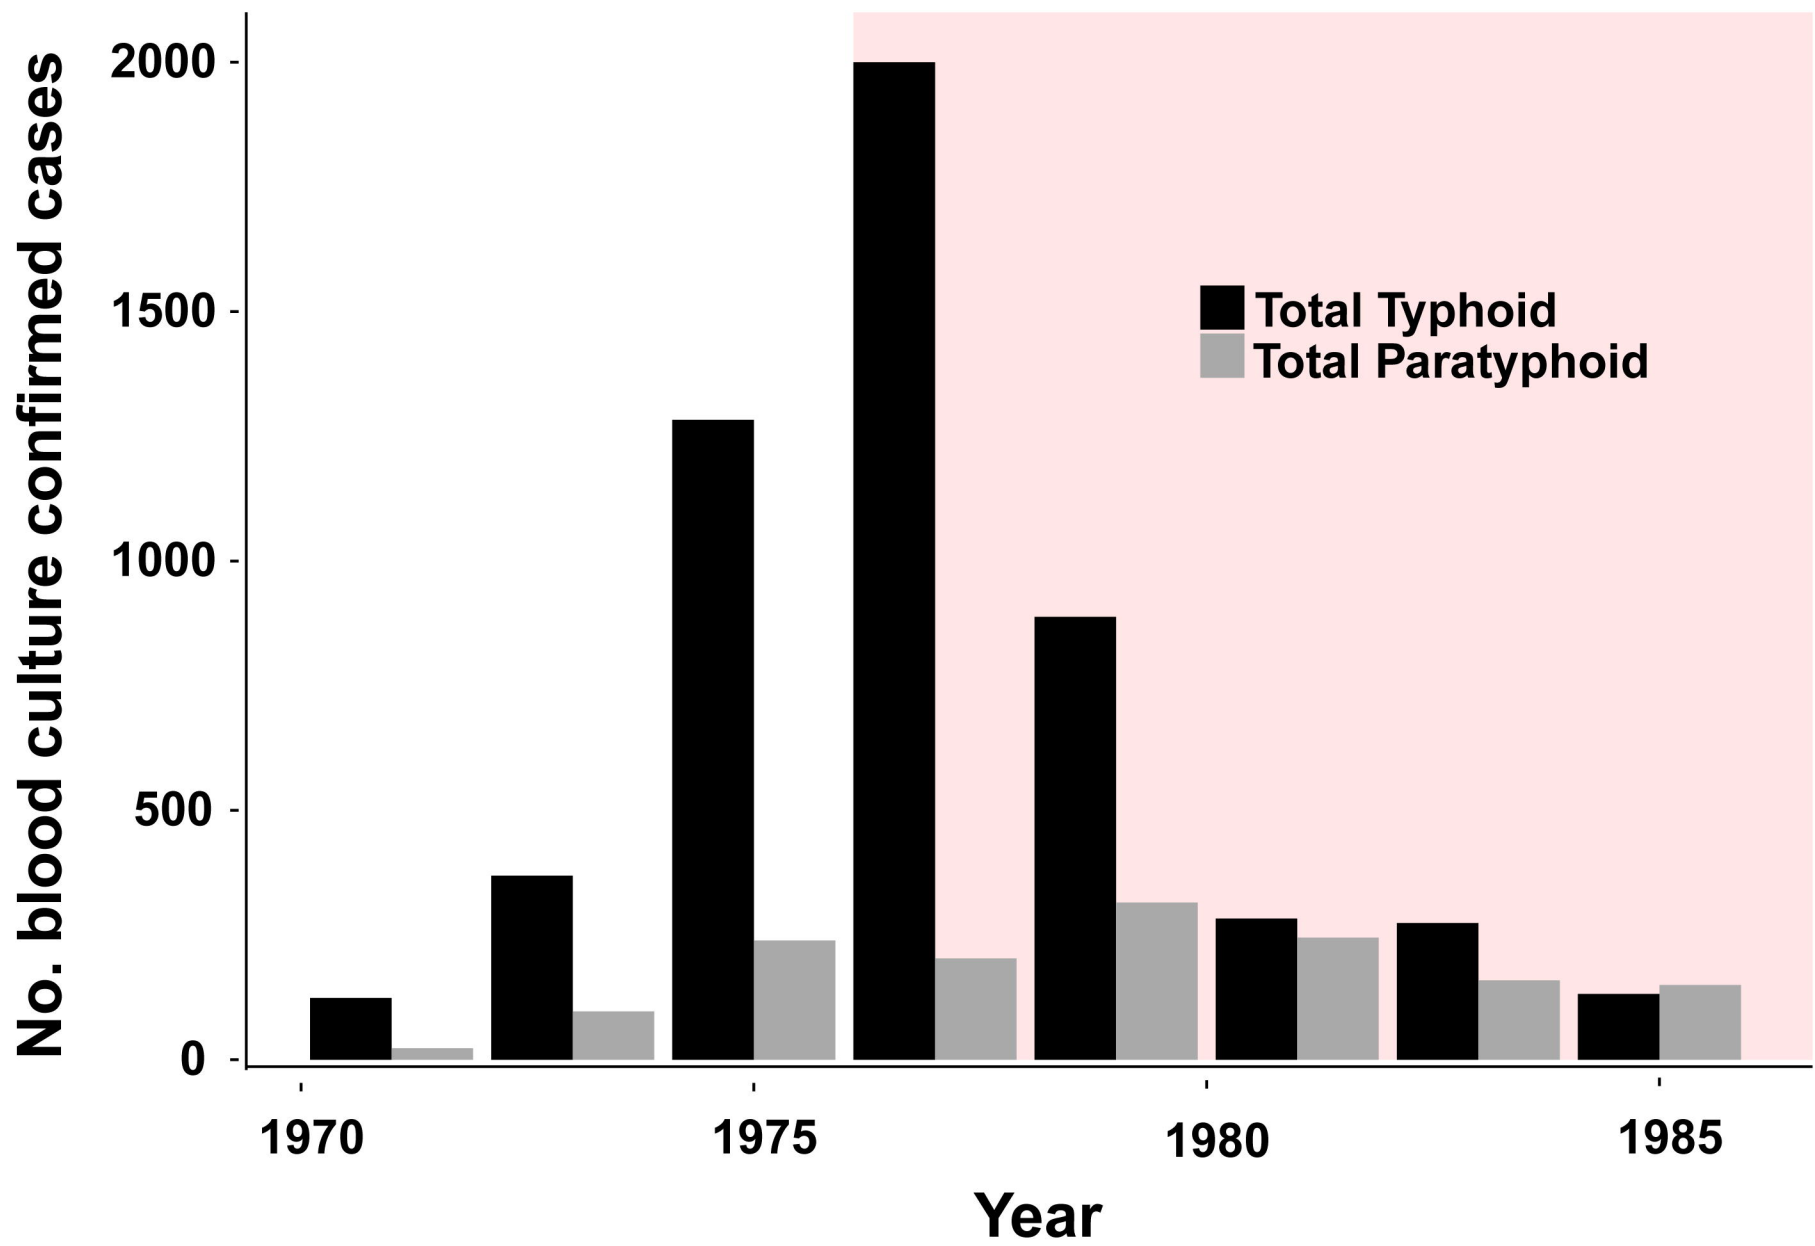







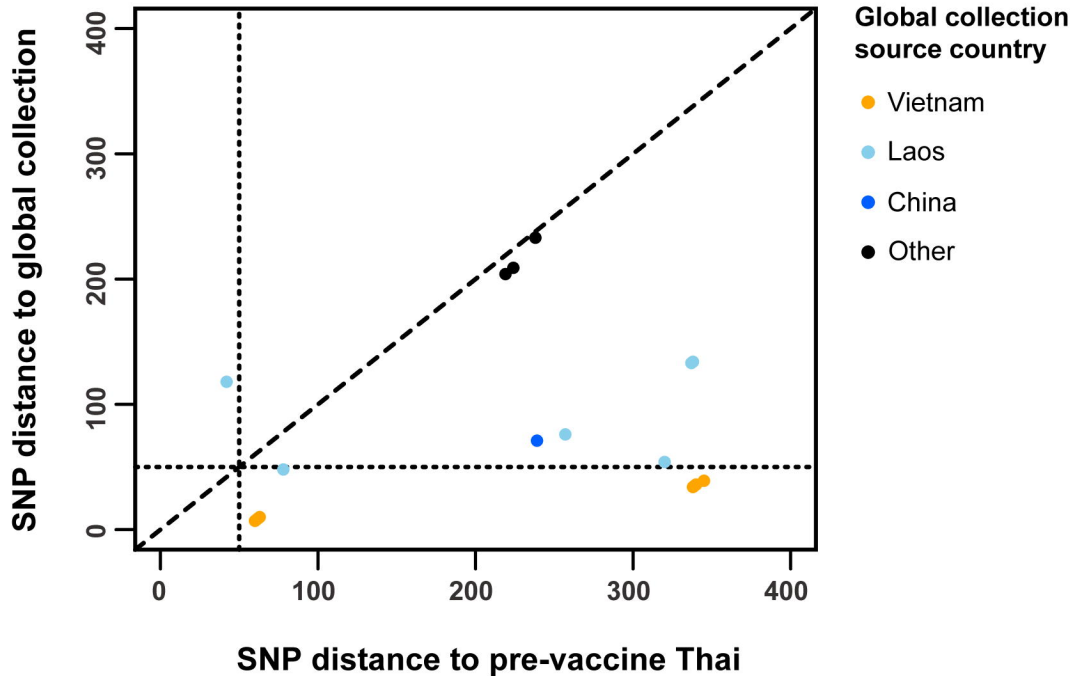

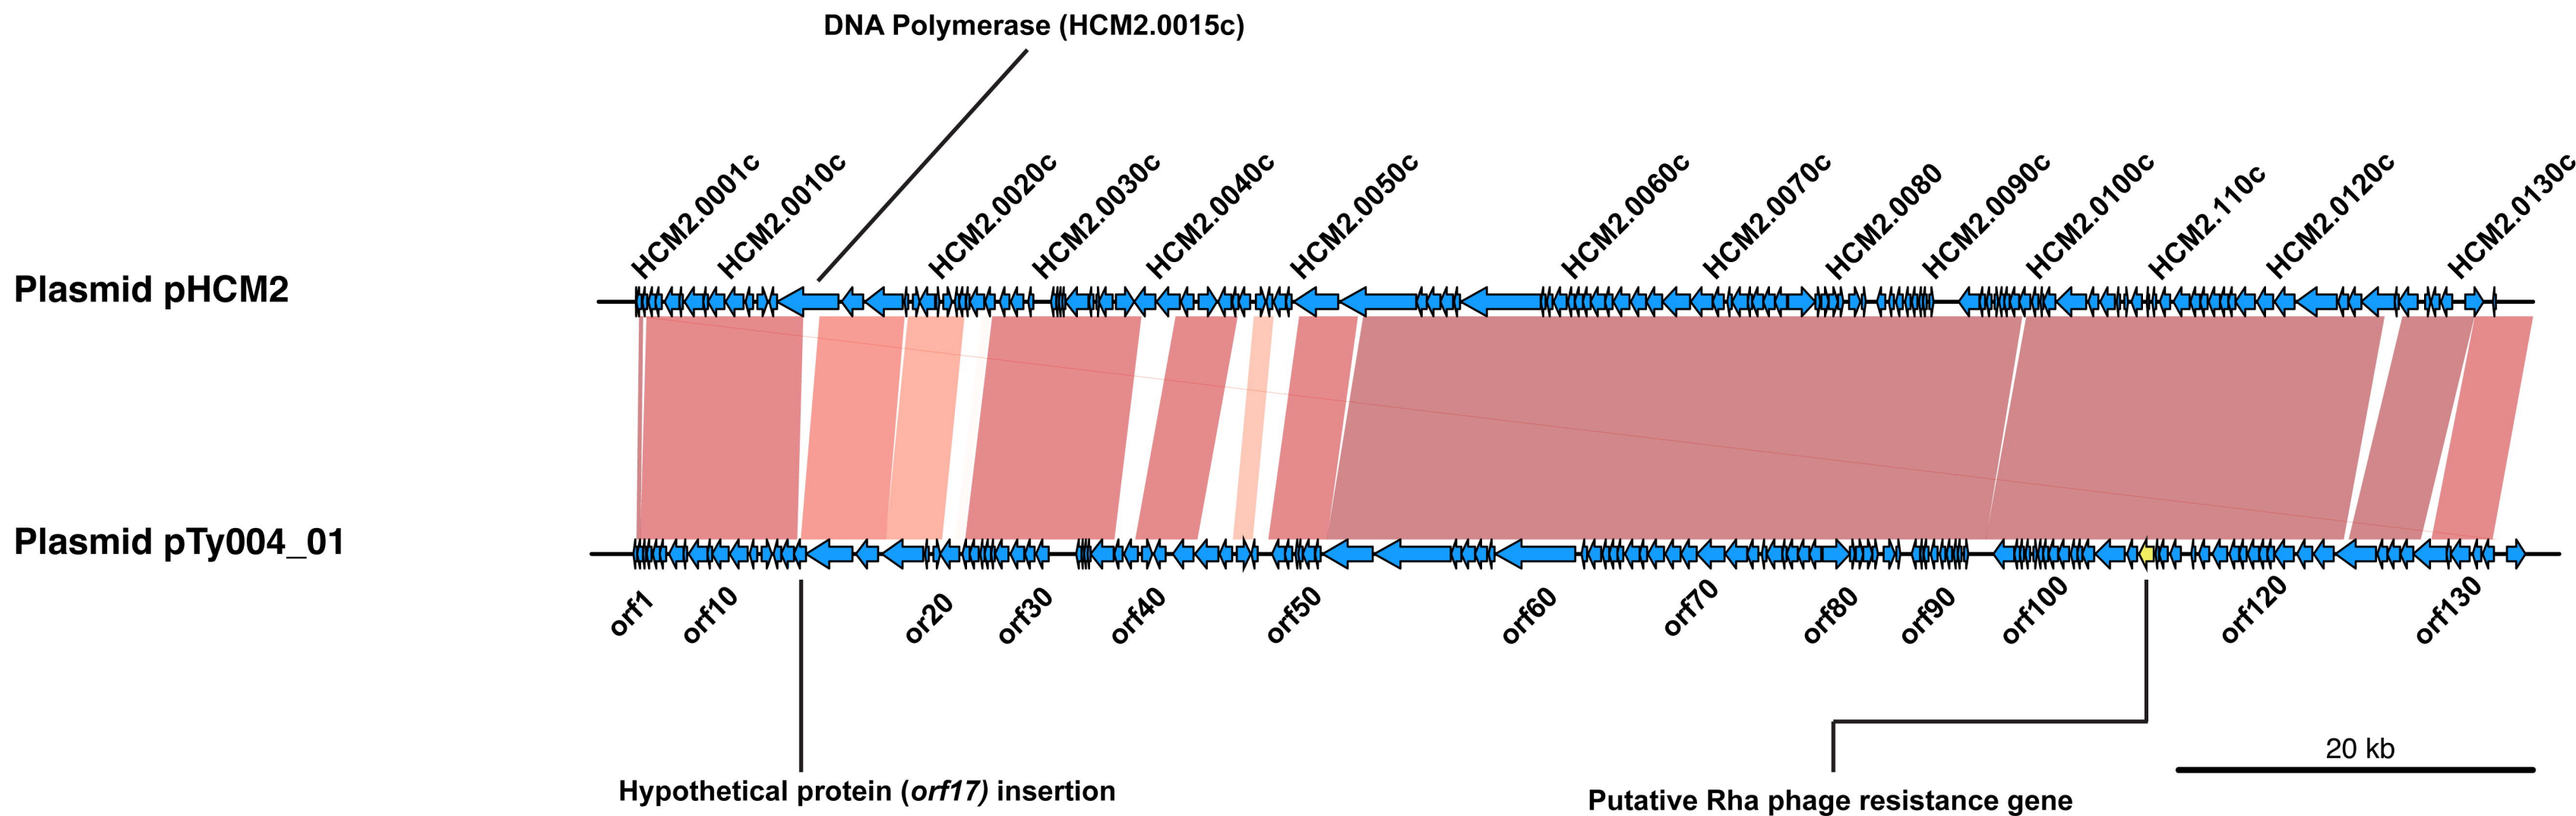

**A**

Phage fiae91-ss

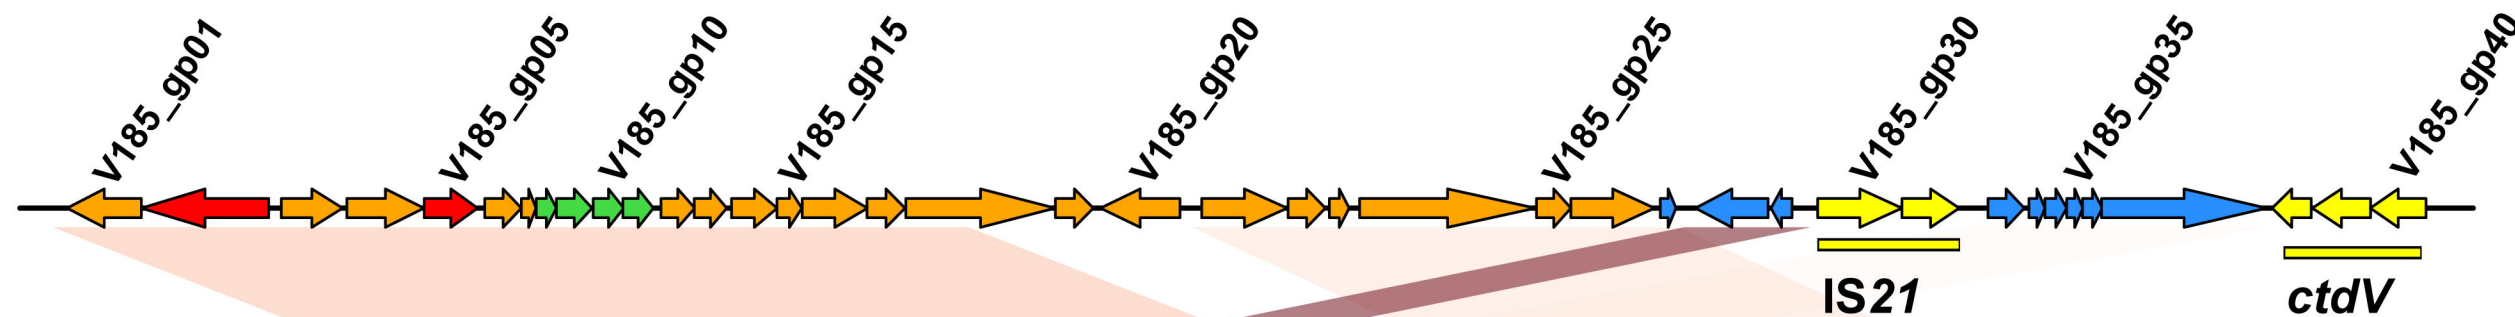

Phage STYP1

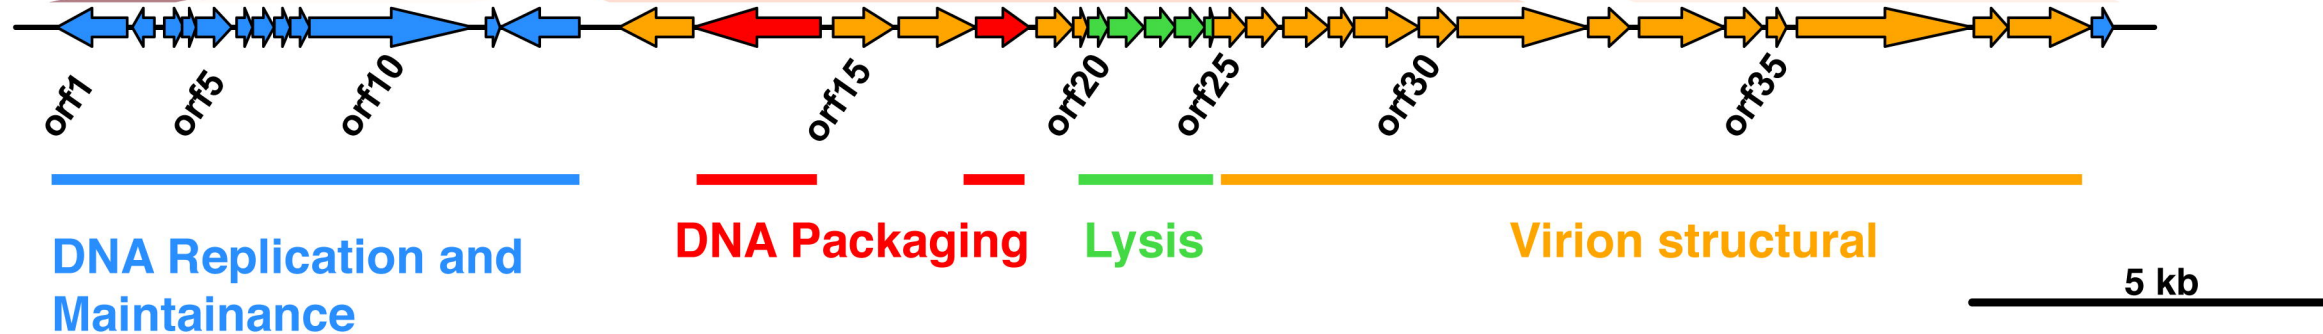

**B**

Phage SflV

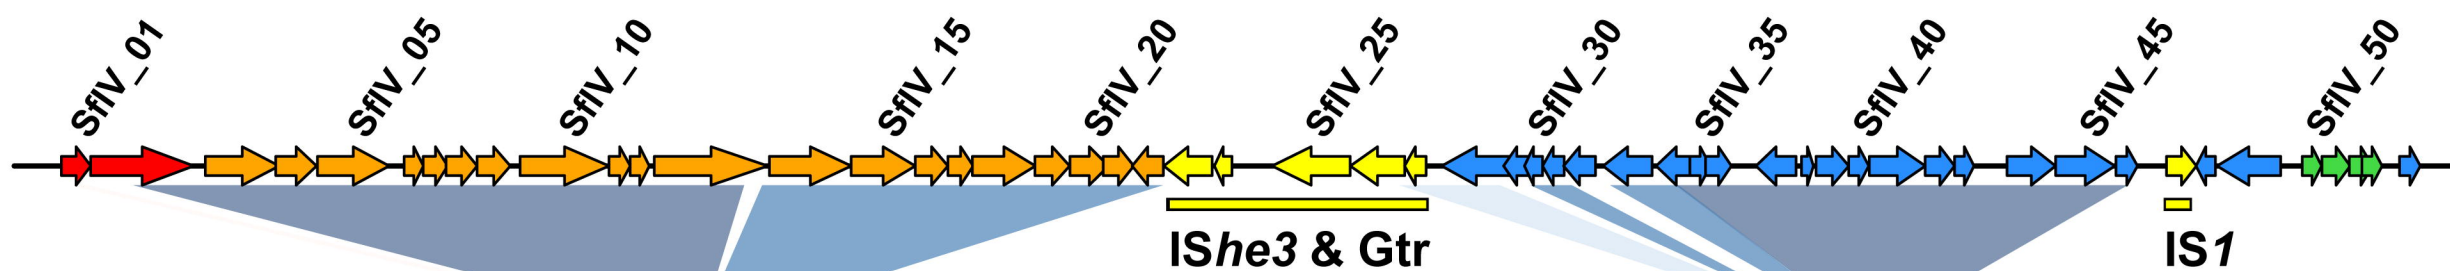

Phage STYP2

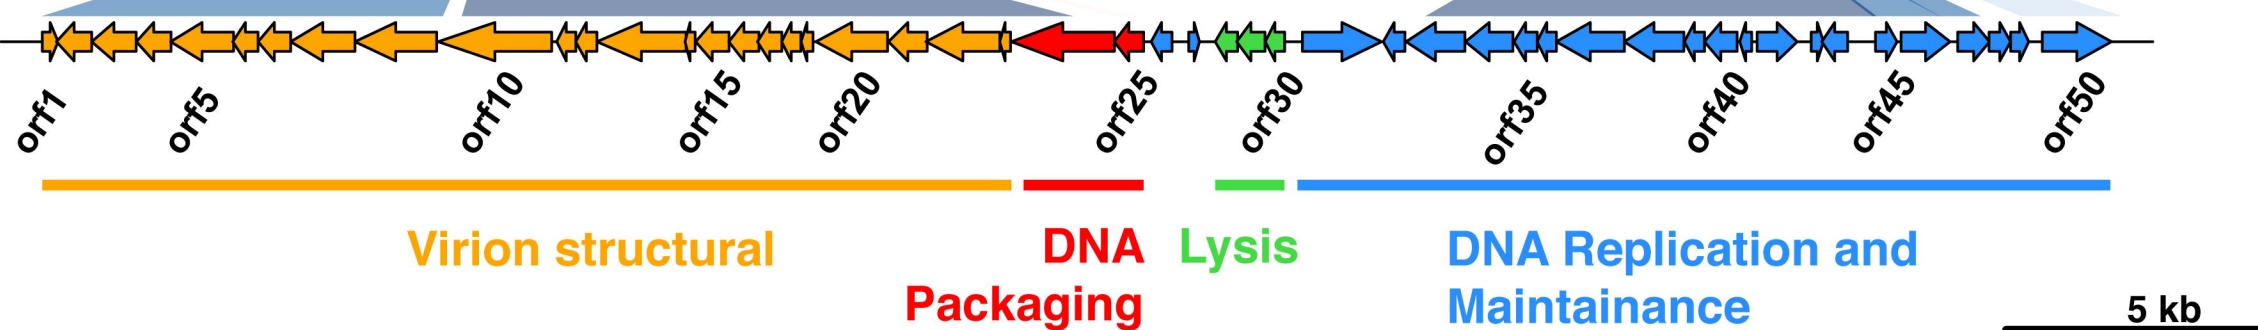

Source: http://biorxiv.org/cgi/reprint/076422v2
